# Supplementary material for: Microplastics in Different Tissues of a Commonly Consumed Fish, Scomberomorus guttatus, from a Large Subtropical Estuary: Accumulation, Characterization, and Contamination Assessment
Source: MDPI journal article supplement (doi:10.3390/biology12111422), 2023-11-12
Supplement: s1 [file s1]

Table S1: Contamination level assessment indices

| Eq. | Index                        | Depiction and objectives                                                                   | Principle                                                               | Explanation                                                                                                  | Pollution degree criteria                                                                                                    |
|-----|------------------------------|--------------------------------------------------------------------------------------------|-------------------------------------------------------------------------|--------------------------------------------------------------------------------------------------------------|------------------------------------------------------------------------------------------------------------------------------|
| 1.  | Contamination factor (CF)    | CF is used to estimate the MPs contamination.                                              | $CF = \frac{C_{(sample)}}{C_{(background)}}$                            | Here, $C_{(sample)}$ is the concentration of MPs, $C_{(background)}$ is the background concentration of MPs. | CF<1: Low contamination<br>1<CF<3: Moderate contamination<br>3<CF<6: Considerable contamination<br>CF>6: Very high pollution |
| 2.  | Degree of contamination (CD) | CD is used to evaluate MPs                                                                 | $CD = \sum CF$                                                          | Here, CF is the contamination factor which is determined by Eq. 1.                                           | CD < 5: low<br>5<CD<10: moderate<br>10<CD<20: considerable<br>20>CD: very high                                               |
| 3.  | Pollution Load Index (PLI)   | PLI can be used for assessing of comparison of contamination status among the study sites. | $PLI = \sqrt[n]{CF_1 \times CF_2 \times CF_3 \times \dots \times CF_n}$ | Here, n is the total number of samples, and CF is calculated as described in the earlier equation (Eq. 1).   | PLI<1: No pollution;<br>PLI>1: Polluted                                                                                      |
